# Supplementary material for: Male recombination map of the autosomal genome in German Holstein
Source: PubMed Central journal article supplement (PMC7734841; doi:10.1186/s12711-020-00593-z), 2020-12-14

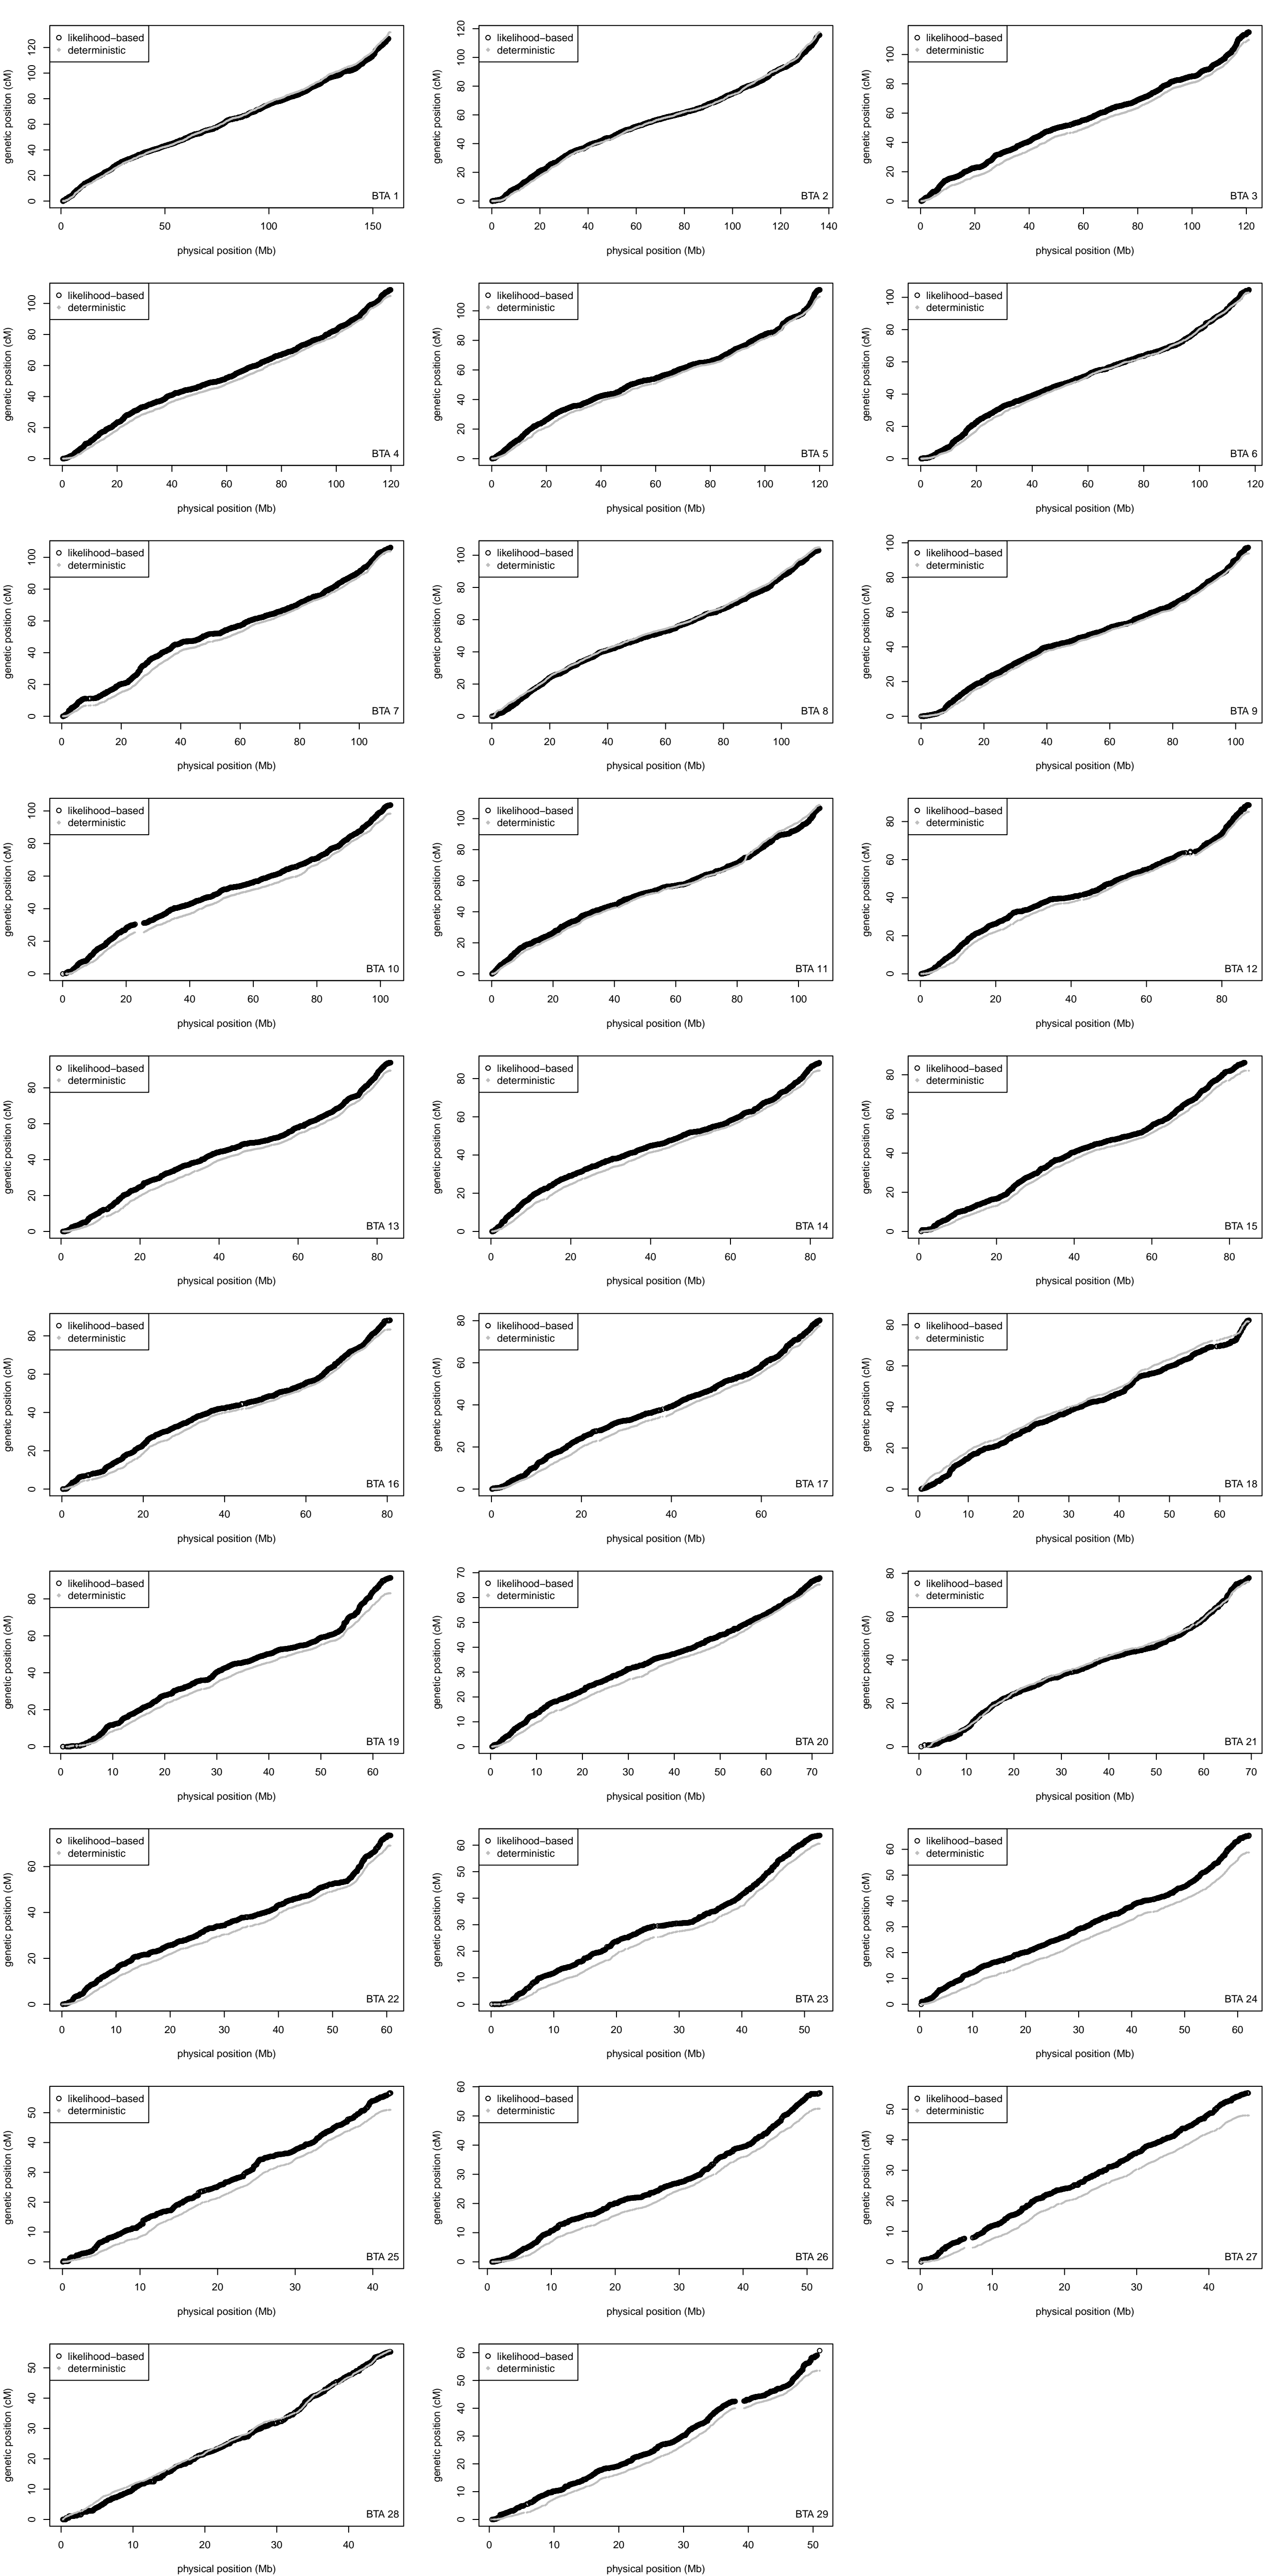

Supplement: 12711_2020_593_MOESM4_ESM.pdf [file 12711_2020_593_MOESM4_ESM.pdf]
